# Supplementary material for: Comparative Study of Microabrasion and Resin Infiltration on Enamel Color Stability and Surface Characteristics: A Systematic Review
Source: Research Square preprint supplement (doi:10.21203/rs.3.rs-7670684/v1), 2025-10-30
Supplement: Supplementary file 1 [file c853d2db73347520e2c10357.docx]

# PRISMA 2020 Checklist for Updated Systematic Review

Manuscript Title: Comparative Study of Microabrasion and Resin Infiltration on Enamel Color Stability and Surface Characteristics: An Updated Systematic Review

Journal: Journal of International Society of Preventive & Community Dentistry (JISPCD)

PRISMA Checklist below confirms compliance with systematic review reporting standards.

| Section/Topic | Checklist Item | Reported on Page # |
| --- | --- | --- |
| Title | Identify the report as a systematic review. | Page 1 |
| Abstract | Provide a structured summary of background, methods, results, conclusions. | Page 1 |
| Introduction | Describe rationale and objectives of the review. | Page 2 |
| Eligibility Criteria | Specify inclusion and exclusion criteria. | Page 3 |
| Information Sources | List all databases and sources searched. | Page 3 |
| Search Strategy | Provide the full search strategy or keywords. | Page 3 |
| Selection Process | Describe process for selecting studies. | Page 3 |
| Data Collection Process | Describe methods for extracting data. | Page 3 |
| Data Items | List all variables and outcomes extracted. | Page 3 |
| Risk of Bias Assessment | Describe methods for assessing risk of bias. | Page 3 |
| Effect Measures | Specify effect measures for comparisons. | Page 4 |
| Synthesis Methods | Describe methods for synthesizing results. | Page 4 |
| Certainty Assessment | Describe methods for assessing certainty using GRADE. | Page 4 |
| Results | Summarize study selection and findings. | Pages 4–5 |
| Discussion | Discuss interpretation, limitations, implications. | Page 5 |
| Funding | Describe funding sources or lack thereof. | Page 6 |
| Conflicts of Interest | Declare any conflicts of interest. | Page 6 |
| Registration | Provide PROSPERO registration number. | Page 3 (Pending) |
